# Supplementary material for: Third-wave cognitive behaviour therapies for weight management: systematic review and network meta-analysis protocol
Source: PubMed Central journal article supplement (PMC6074635; doi:10.1136/bmjopen-2018-023425), 2018-08-01
Supplement: bmjopen-2018-023425supp001.pdf [file bmjopen-2018-023425supp001.pdf]

Supplementary file: Medline search strategy

|    |                                                                                                    |
|----|----------------------------------------------------------------------------------------------------|
| 1  | exp Obesity/                                                                                       |
| 2  | exp Overweight/                                                                                    |
| 3  | exp Body Weight/                                                                                   |
| 4  | exp Body Mass Index/                                                                               |
| 5  | exp Waist Circumference/                                                                           |
| 6  | exp Feeding Behavior/                                                                              |
| 7  | exp Body Weight Changes/                                                                           |
| 8  | exp Caloric Restriction/                                                                           |
| 9  | exp Weight Loss/                                                                                   |
| 10 | obes*.mp.                                                                                          |
| 11 | (overweight or over-weight).mp.                                                                    |
| 12 | (weight adj3 (body or chang* or loss* or maint* or manag* or control* or reduct*)).mp.             |
| 13 | (food adj3 (intake or habit*)).mp.                                                                 |
| 14 | (body mass index or bmi).mp.                                                                       |
| 15 | body adj3 mass.mp.                                                                                 |
| 16 | (calori* adj3 (restrict* or restrain* or reduc*)).mp.                                              |
| 17 | feeding adj3 behavio*.mp.                                                                          |
| 18 | (diet* adj3 (restrict* or restrain* or reduc*)).mp.                                                |
| 19 | (waist* adj3 circumferenc*).mp.                                                                    |
| 20 | 1 or 2 or 3 or 4 or 5 or 6 or 7 or 8 or 9 or 10 or 11 or 12 or 13 or 14 or 15 or 16 or 17 or 18    |
| 21 | ((3rd or third) adj3 wave).mp.                                                                     |
| 22 | (acceptance* adj3 (commit* or mind* or base* or focus* or intervention* or therap* or treat*)).mp. |
| 23 | exp Mindfulness/                                                                                   |
| 24 | (mindful* or mind-ful*).mp.                                                                        |
| 25 | (compassion* adj3 (mind* or base* or focus* or intervention* or therap* or treat*)).mp.            |

|    |                                                                                                           |
|----|-----------------------------------------------------------------------------------------------------------|
| 26 | (behav* adj3 activation).mp.                                                                              |
| 27 | ((meta-cognit* or metacognit*) adj3 (mind* or base* or focus* or intervention* or therap* or treat*)).mp. |
| 28 | (dialectic* adj3 (behavio* or mind* or base* or focus* or intervention* or therap* or treat*)).mp.        |
| 29 | (schema* adj3 (mind* or base* or focus* or intervention* or therap* or treat*)).mp.                       |
| 30 | (function* adj3 analyt*).mp.                                                                              |
| 31 | (relation* adj3 frame*).mp.                                                                               |
| 32 | 20 or 21 or 22 or 23 or 24 or 25 or 26 or 27 or 28 or 29 or 30                                            |
| 33 | 20 and 32                                                                                                 |

Search terms 21 to 31 based upon Linardon et al.'s<sup>18</sup> search strategy. No database search restrictions will be applied.
